# Supplementary material
Source: PubMed Central journal article supplement (PMC5717619)
Supplement: mp7b00532_si_001.pdf [file mp7b00532_si_001.pdf]

## Supplemental Information

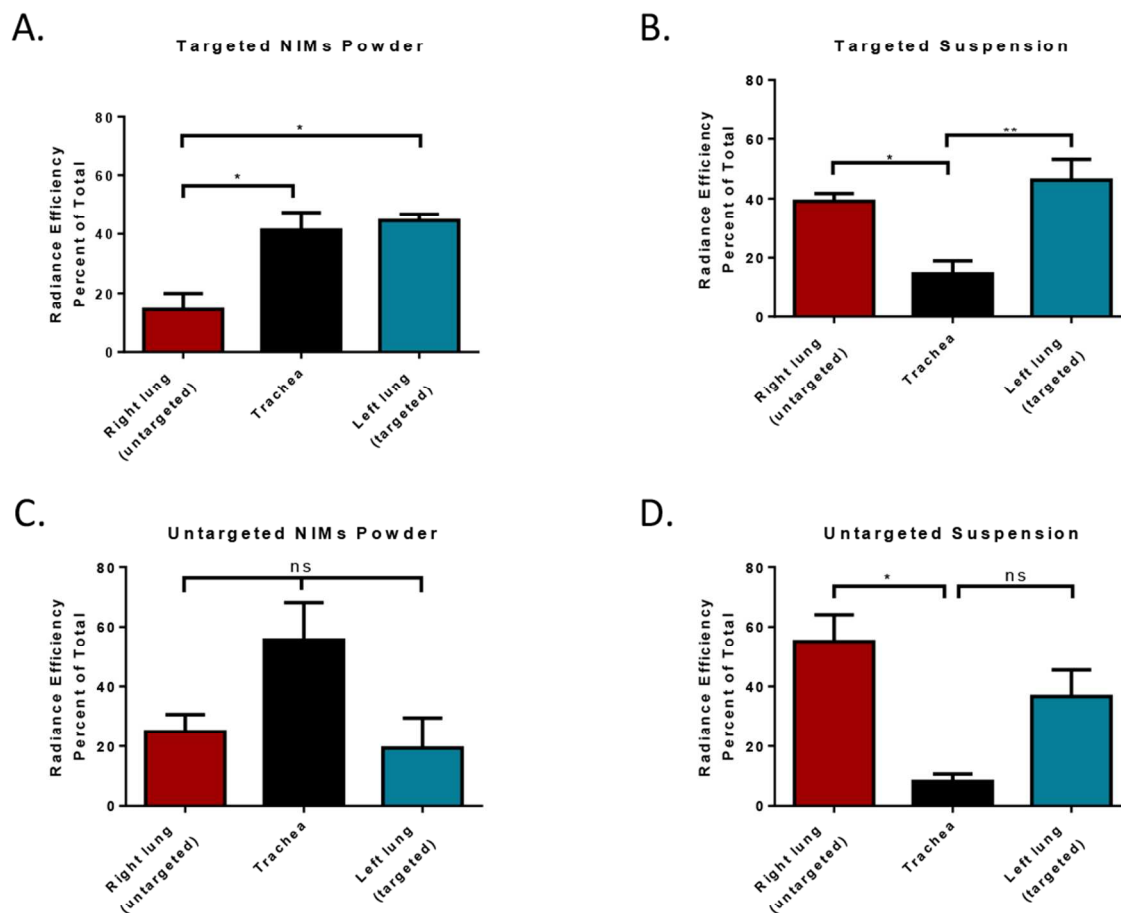

**Supplemental Figure 1.** Effect of magnetic-field-dependent targeting by fluorescence quantification in murine lungs. Comparison of % total Radiance Efficiency (RE) between left lung, right lung, and trachea. A) Targeted NIMs dry powder B) Targeted NIMs suspension C) NIMs dry powder in the absence of magnetic field D) NIMs suspension in the absence of a magnetic field. A one-way ANOVA with Tukey's multiple comparison post-test was used to determine statistical significance. \* $p < .05$ ; \*\* $p < .01$ ; data shown with standard error of the mean (SEM) and  $n=3$ .

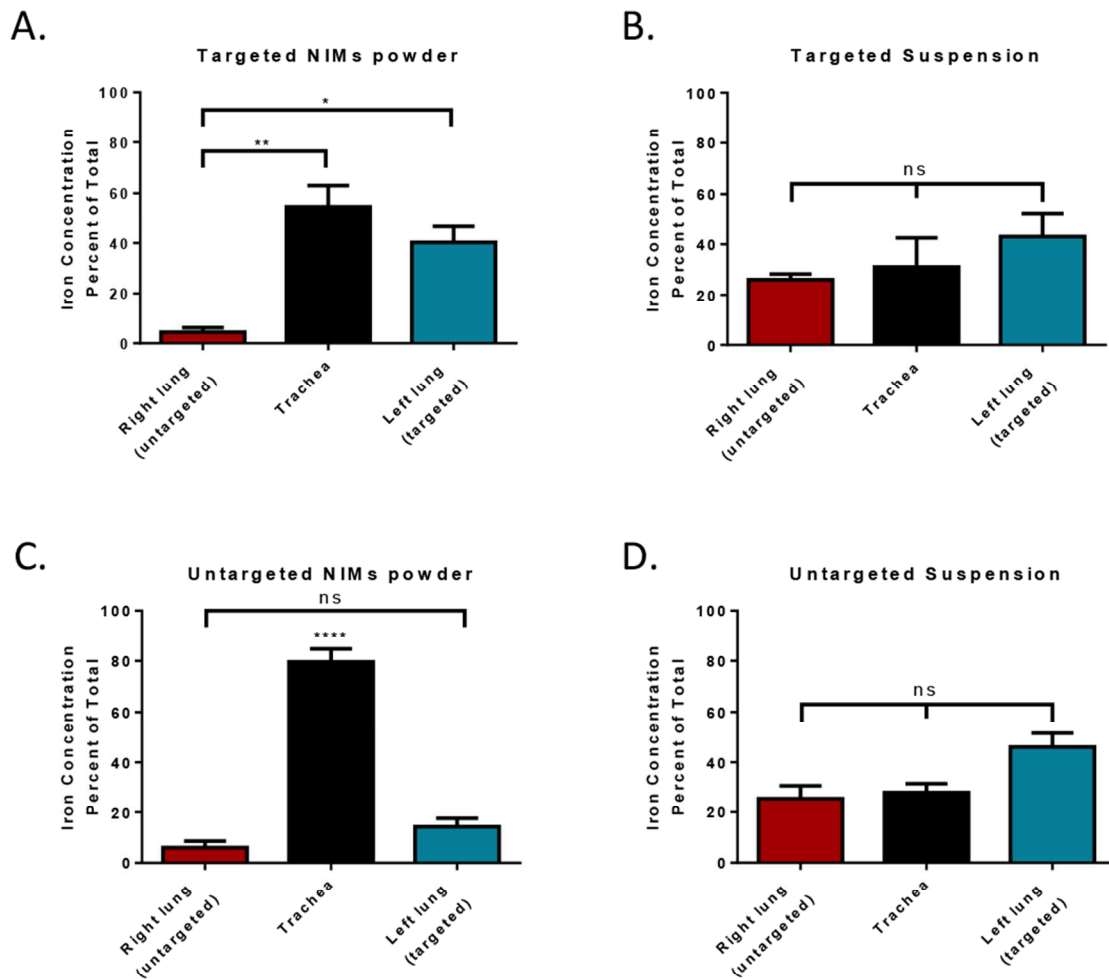

**Supplemental Figure 2.** Effect of magnetic-field-dependent targeting by iron (SPION) quantification in murine lungs. Comparison of % total iron between left lung, right lung, and trachea. A) Targeted NIMs dry powder B) Targeted NIMs suspension C) NIMs dry powder in the absence of a magnetic field D) NIMs suspension in the absence of a magnetic field. A one-way ANOVA with Tukey’s multiple comparison post-test was used to determine statistical significance. \* $p < .05$ ; \*\* $p < .01$ ; data shown with standard error of the mean (SEM) and  $n=3$ .
